# Supplementary material for: Clinical molecular testing for ASXL1 c.1934dupG p.Gly646fs mutation in hematologic neoplasms in the NGS era
Source: PubMed Central journal article supplement (PMC6141087; doi:10.1371/journal.pone.0204218), 2018-09-17

# A (Phiion DNA Pol)

Case s1, VF 3.5

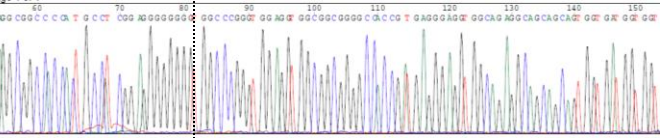

Case s2, VF 3.8

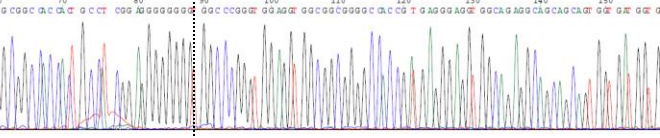

Case s3, VF 3.8

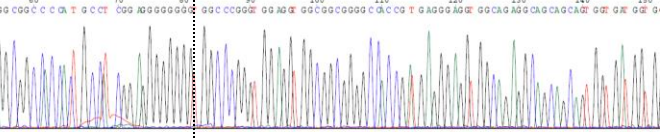

Case s4, VF 3.4

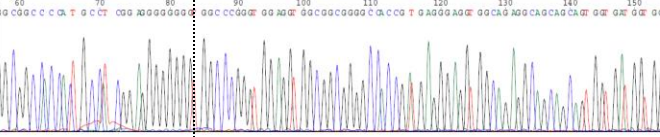

Case s5, VF 4.2

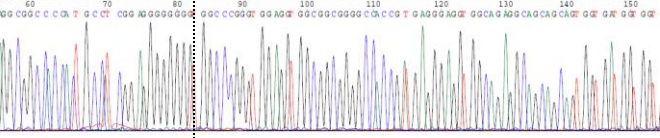

Case s6, VF 2.9

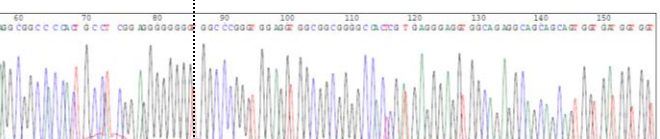

Case s7, VF 3.8

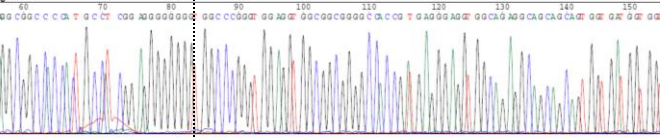

Case s8, VF 3.1

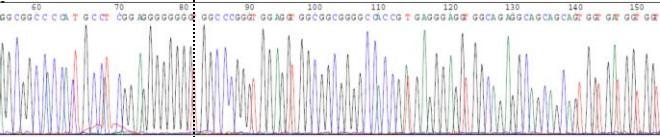

Case s9, VF 3.7

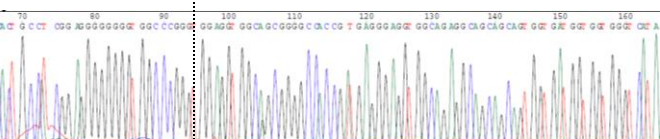

Case s10, VF 3.6

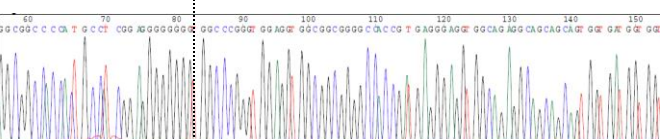

# B (KAPPA HiFi Pol)

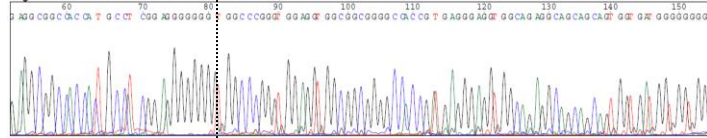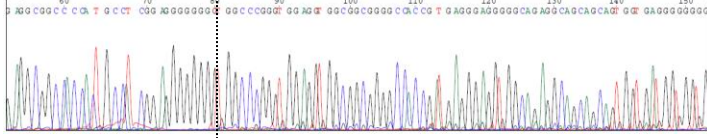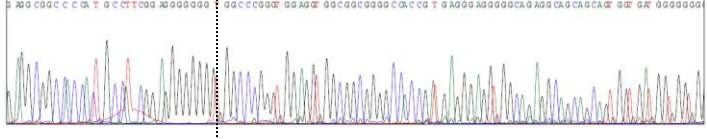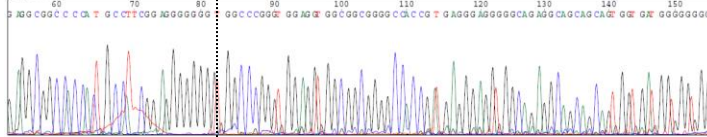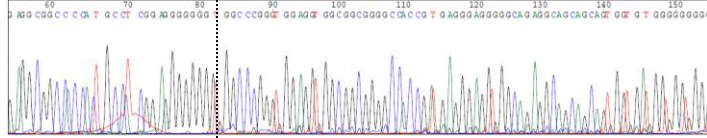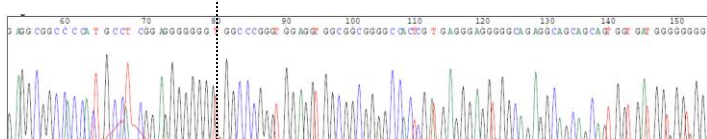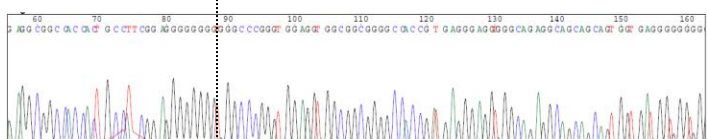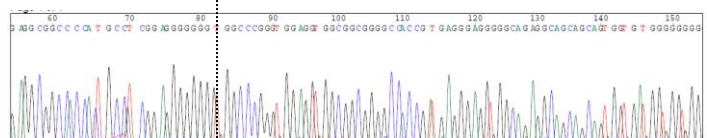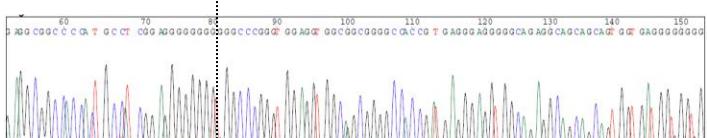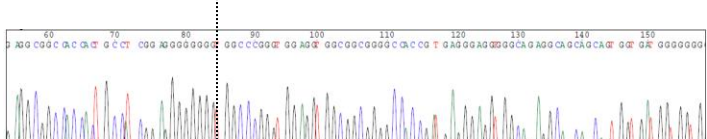

# A (Phusion DNA Pol)

Case s11, VF 3.0

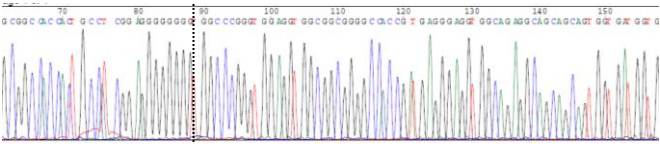

Case s12, VF 3.8

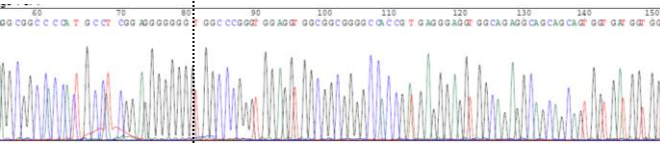

Case s13, VF 3.4

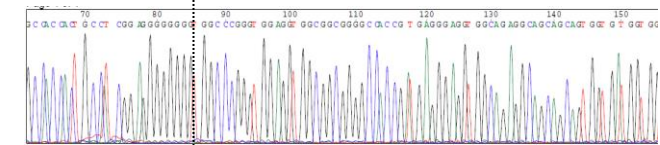

Case s14, VF 2.7

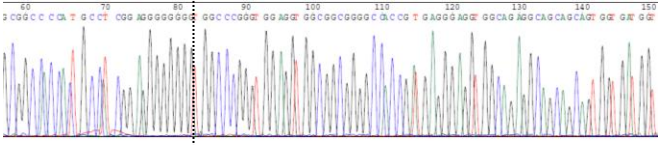

Case s15, VF 40.8

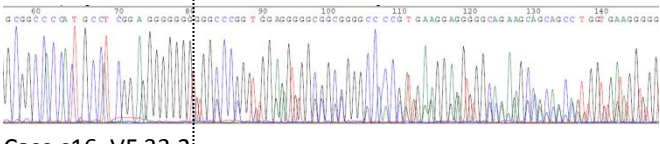

Case s16, VF 33.2

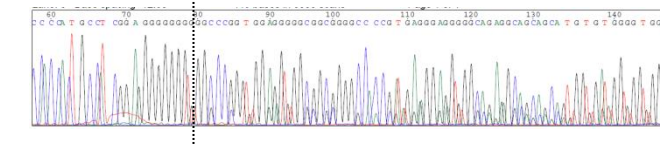

Case s17, VF 39

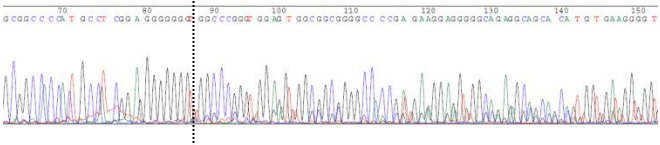

Case s18, VF 43

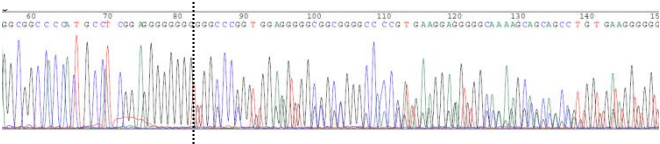

Case s19, VF 32.6

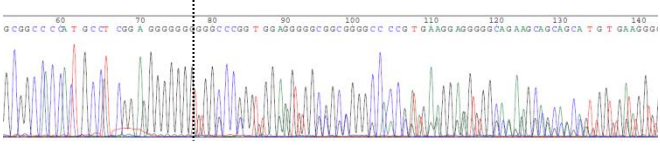

# B (KAPPA HiFi Pol)

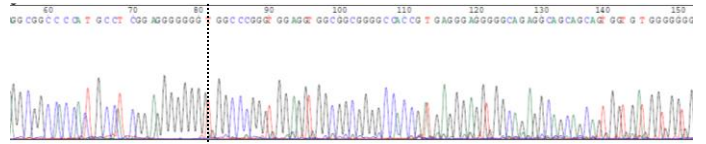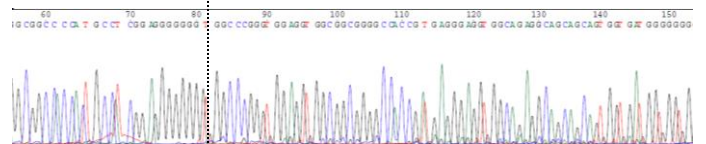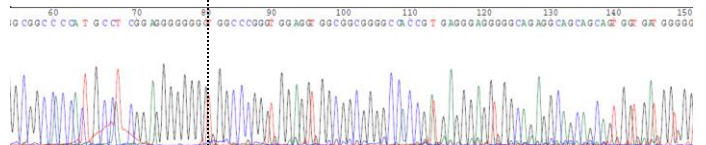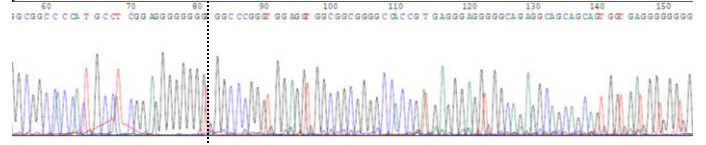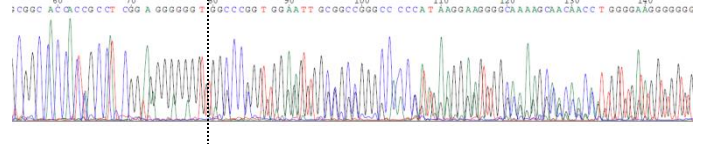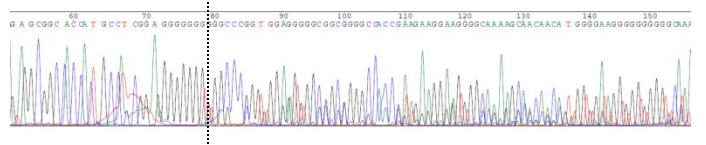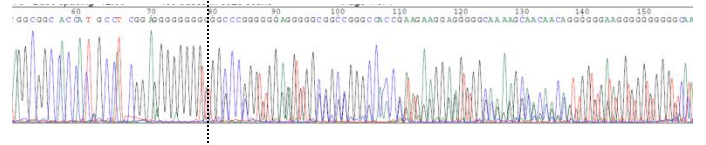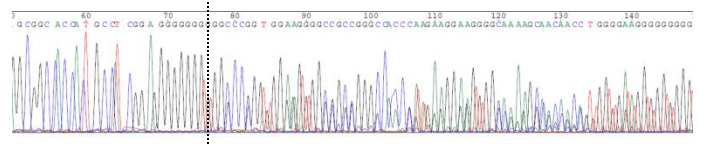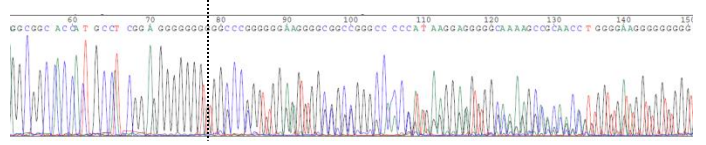

Supplement: pone.0204218.s001.pdf [file pone.0204218.s001.pdf]
